# Supplementary material for: Real-world evidence of eteplirsen treatment effects in patients with Duchenne muscular dystrophy in the USA
Source: Atypon-hosted journal article supplement (doi:10.57264/cer-2023-0086), 2023-08-23
Supplement: supplemnetary data.docx [file supplemnetary%20data.docx]

**Appendix Table 1: Poisson Regression Analysis Results**

| **Outcome Variable** | **Coefficient**  **(N = 778)** | **Standard Error** | **P-value** | **95% CI** |
| --- | --- | --- | --- | --- |
| Adjusted Hospital Encounter | -0.378 | 0.166 | 0.023* | [-0.704, -0.051] |
| Adjusted Emergency Room | -0.371 | 0.143 | 0.009* | [-0.651, -0.091] |
| Assisted Ventilation | -0.495 | 0.196 | 0.011* | [-0.879, -0.111] |
| Cardiac Management | -0.236 | 0.102 | 0.021* | [-0.437, -0.036] |
| Cough Assist Device | -0.123 | 0.190 | 0.517 | [-0.494, 0.249] |
| ER Days | -0.392 | 0.145 | 0.007* | [-0.676, -0.107] |
| Hospital Days | -0.412 | 0.157 | 0.009* | [-0.720, -0.104] |
| ICU | -0.065 | 0.333 | 0.845 | [-0.717, 0.587] |
| ICU Days | -0.099 | 0.332 | 0.765 | [-0.751, 0.552] |
| Motorized Wheelchair | -0.017 | 0.123 | 0.892 | [-0.258, 0.225] |
| Pulmonary Management | -0.400 | 0.193 | 0.039* | [-0.779, -0.020] |
| Scoliosis | -0.222 | 0.347 | 0.523 | [-0.902, 0.459] |
| Tracheostomy | -1.982 | 0.613 | 0.001* | [-3.184, -0.780] |

ER, emergency room; ICU, intensive care unit; SD, standard deviation. * indicates statistical significance.

Appendix Table 2. Sensitivity Analyses Poisson Regressions in the Matched Treated and SoC Patients

|  | **Including Patients Treated with Golodirsen**  **(N = 828)** | | **Including Female Patients**  **(N = 784)** | | **Eteplirsen, excluding patients older than 28.1 years old**  **(N = 766)** | |
| --- | --- | --- | --- | --- | --- | --- |
| **Outcome Variable** | **Coefficient** | **P-value** | **Coefficient** | **P-value** | **Coefficient** | **P-value** |
| Adjusted Hospital Encounter | -0.338 | 0.030 | -0.373 | 0.025 | -0.410 | 0.013 |
| Adjusted Emergency Room | -0.341 | 0.016 | -0.369 | 0.009 | -0.416 | 0.003 |
| Assisted Ventilation | -0.705 | 0.000 | -0.494 | 0.012 | -0.688 | 0.001 |
| Cardiac Management | -0.263 | 0.009 | -0.239 | 0.019 | -0.245 | 0.017 |
| Cough Assist Device | -0.182 | 0.319 | -0.123 | 0.518 | -0.138 | 0.458 |
| ER Days | -0.355 | 0.013 | -0.387 | 0.007 | -0.420 | 0.003 |
| Hospital Days | -0.315 | 0.011 | -0.412 | 0.009 | -0.454 | 0.003 |
| ICU | -0.538 | 0.143 | -0.061 | 0.854 | -0.234 | 0.480 |
| ICU Days | -0.463 | 0.168 | -0.095 | 0.775 | -0.275 | 0.407 |
| Motorized Wheelchair | -0.046 | 0.698 | -0.005 | 0.965 | 0.005 | 0.969 |
| Pulmonary Management | -0.511 | 0.004 | -0.400 | 0.039 | -0.584 | 0.004 |
| Scoliosis | -0.299 | 0.389 | -0.222 | 0.521 | -0.231 | 0.505 |
| Tracheostomy | -2.253 | 0.000 | -1.980 | 0.001 | -2.065 | 0.000 |

ER, emergency room; ICU, intensive care unit.
